# Supplementary material for: Conditions to meet for the [CuOH]+ site to be favorable and reactive toward the conversion of methane to methanol over Cu-MOR zeolite
Source: Royal Society of Chemistry journal article supplement (doi:10.1039/d3cy00929g), 2023-01-01
Supplement: d3cy00929g2.pdf [file d3cy00929g2.pdf]

*Electronic Supporting Information*

**Conditions to meet for the [CuOH]<sup>+</sup> site to be favorable and reactive toward the conversion of methane to methanol over Cu-MOR zeolite**

Muhammad Haris Mahyuddin,<sup>\*,a,b</sup> Elbert Timothy Lasiman,<sup>a</sup> Adhitya Gandaryus Saputro,<sup>a,b</sup> Suci Valerie Casuarina,<sup>a</sup> Nugraha,<sup>a,b</sup> and Hermawan Kresno Dipojono<sup>a,b</sup>

<sup>a</sup> Research Group of Advanced Functional Materials, Faculty of Industrial Technology, Institut Teknologi Bandung, Bandung 40132, Indonesia

<sup>b</sup> Research Center for Nanoscience and Nanotechnology, Institut Teknologi Bandung, Bandung 40132, Indonesia

\* To whom all correspondences should be addressed

(e-mail: mahyuddin133[at]itb.ac.id).

## Table of Contents:

|                 |                                                                                                                             |
|-----------------|-----------------------------------------------------------------------------------------------------------------------------|
| <b>Table S1</b> | Geometrical parameters along the CH <sub>4</sub> oxidation on the 8-MR side pocket                                          |
| <b>Table S2</b> | Geometrical parameters along the CH <sub>4</sub> activation on the 12-MR opening (Al <sub>141</sub> arrangement)            |
| <b>Table S3</b> | Geometrical parameters along the CH <sub>4</sub> activation on the 12-MR opening (Al <sub>241</sub> arrangement)            |
| <b>Fig. S1</b>  | Small cluster model of CuOH-MOR for molecular orbital calculations                                                          |
| <b>Fig. S2</b>  | Structures of <b>TS<sub>H0</sub></b> and <b>TS<sub>He</sub></b> on CuOH@Al <sub>44</sub>                                    |
| <b>Fig. S3</b>  | Considered CuOH-MOR models with the presence of a Cu <sup>2+</sup> spectator site                                           |
| <b>Fig. S4</b>  | Energy diagram of the heterolytic C–H bond activation on CuOH@Al <sub>241</sub>                                             |
| <b>Fig. S5</b>  | PDOS for the heterolytic CH <sub>4</sub> activation on the CuOH@Al <sub>44</sub> and CuOH@Al <sub>241</sub> sites           |
| <b>Fig. S6</b>  | HOH⋯CH <sub>3</sub> interaction in <b>INT-1<sub>H0</sub></b> for the CuOH@Al <sub>44</sub> and CuOH@Al <sub>241</sub> sites |

**Table S1.** Geometrical parameters and atomic spin densities ( $\rho$ ) along the CH<sub>4</sub> oxidation to CH<sub>3</sub>OH on the 8-MR side pocket of MOR with the assistance of H<sub>2</sub>O.

| Reaction step             | Ground state | d(Cu-O) (Å) | d(Cu-C) (Å) | d(C-H <sub>Me</sub> ) (Å) | d(O-H <sub>Me</sub> ) (Å) | $\rho$ (Cu) | $\rho$ (O) | $\rho$ (C) |
|---------------------------|--------------|-------------|-------------|---------------------------|---------------------------|-------------|------------|------------|
| <b>AS</b>                 | doublet      | 1.81        | 3.23        | 1.10                      | 2.52                      | 0.54        | 0.30       | 0.00       |
| <b>TS<sub>He</sub></b>    | doublet      | 1.93        | 2.17        | 1.36                      | 1.29                      | 0.46        | 0.26       | 0.20       |
| <b>INT-1<sub>He</sub></b> | doublet      | 2.04        | 1.94        | 2.99                      | 0.98                      | 0.53        | 0.08       | 0.30       |
| <b>INT-2</b>              | doublet      | 2.09        | 1.97        | 2.88                      | 0.98                      | 0.52        | 0.07       | 0.29       |
| <b>TS<sub>Ho</sub></b>    | doublet      | 1.87        | 3.56        | 1.41                      | 1.17                      | 0.18        | 0.24       | 0.50       |
| <b>INT-1<sub>Ho</sub></b> | doublet      | 1.91        | 3.92        | 2.00                      | 0.99                      | 0.01        | 0.06       | 0.87       |

**Table S2.** Geometrical parameters and atomic spin densities ( $\rho$ ) along the CH<sub>4</sub> oxidation to CH<sub>3</sub>OH on the 12-MR opening of MOR (Al<sub>141</sub> arrangement).

| Reaction step             | Ground state | d(Cu-O) (Å) | d(Cu-C) (Å) | d(C-H <sub>Me</sub> ) (Å) | d(O-H <sub>Me</sub> ) (Å) | $\rho$ (Cu) | $\rho$ (Cu <sub>spec</sub> ) | $\rho$ (O) | $\rho$ (C) |
|---------------------------|--------------|-------------|-------------|---------------------------|---------------------------|-------------|------------------------------|------------|------------|
| <b>AS</b>                 | triplet      | 1.77        | 3.29        | 1.10                      | 2.73                      | 0.58        | 0.48                         | 0.41       | 0.00       |
| <b>TS-1<sub>He</sub></b>  | triplet      | 1.91        | 2.30        | 1.36                      | 1.29                      | 0.52        | 0.44                         | 0.26       | 0.32       |
| <b>INT-1<sub>He</sub></b> | triplet      | 2.05        | 2.00        | 3.70                      | 0.97                      | 0.66        | 0.41                         | 0.03       | 0.46       |
| <b>TS-2</b>               | singlet      | 1.80        | 2.07        | 3.75                      | 4.65                      | 0.00        | 0.00                         | 0.00       | 0.00       |
| <b>FS</b>                 | singlet      | 1.46        | 2.89        | 4.41                      | 4.55                      | 0.00        | 0.00                         | 0.00       | 0.00       |

**Table S3.** Geometrical parameters and atomic spin densities ( $\rho$ ) along the CH<sub>4</sub> oxidation to CH<sub>3</sub>OH on the 12-MR opening of MOR (Al<sub>241</sub> arrangement).

| Reaction step             | Ground state | d(Cu-O) (Å) | d(Cu-C) (Å) | d(C-H <sub>Me</sub> ) (Å) | d(O-H <sub>Me</sub> ) (Å) | $\rho$ (Cu) | $\rho$ (Cu <sub>spec</sub> ) | $\rho$ (O) | $\rho$ (C) |
|---------------------------|--------------|-------------|-------------|---------------------------|---------------------------|-------------|------------------------------|------------|------------|
| <b>AS</b>                 | triplet      | 1.77        | 4.54        | 1.10                      | 2.64                      | 0.59        | 0.47                         | 0.39       | 0.00       |
| <b>TS-1<sub>Ho</sub></b>  | triplet      | 1.86        | 3.77        | 1.32                      | 1.26                      | 0.44        | 0.38                         | 0.31       | 0.47       |
| <b>INT-1<sub>Ho</sub></b> | triplet      | 1.92        | 4.02        | 1.98                      | 1.00                      | 0.37        | 0.34                         | 0.06       | 0.87       |
| <b>INT-2</b>              | singlet      | 1.78        | 1.95        | 2.30                      | 4.13                      | 0.00        | 0.00                         | 0.00       | 0.00       |
| <b>TS-2</b>               | singlet      | 1.79        | 2.04        | 3.70                      | 5.13                      | 0.00        | 0.00                         | 0.00       | 0.00       |
| <b>FS</b>                 | singlet      | 1.88        | 2.93        | 4.60                      | 4.65                      | 0.00        | 0.00                         | 0.00       | 0.00       |

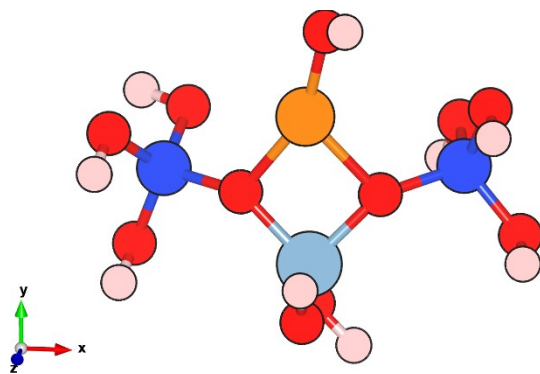

**Fig. S1** Small cluster model of CuOH-MOR for molecular orbital calculations.

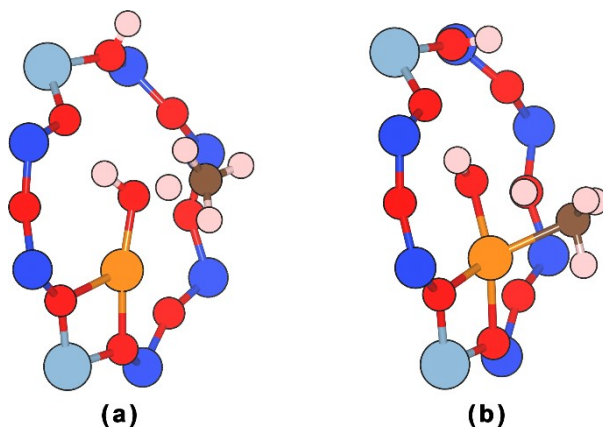

**Fig. S2** Structures of (a)  $TS_{H_0}$  and (b)  $TS_{He}$  on CuOH@Al<sub>44</sub>.

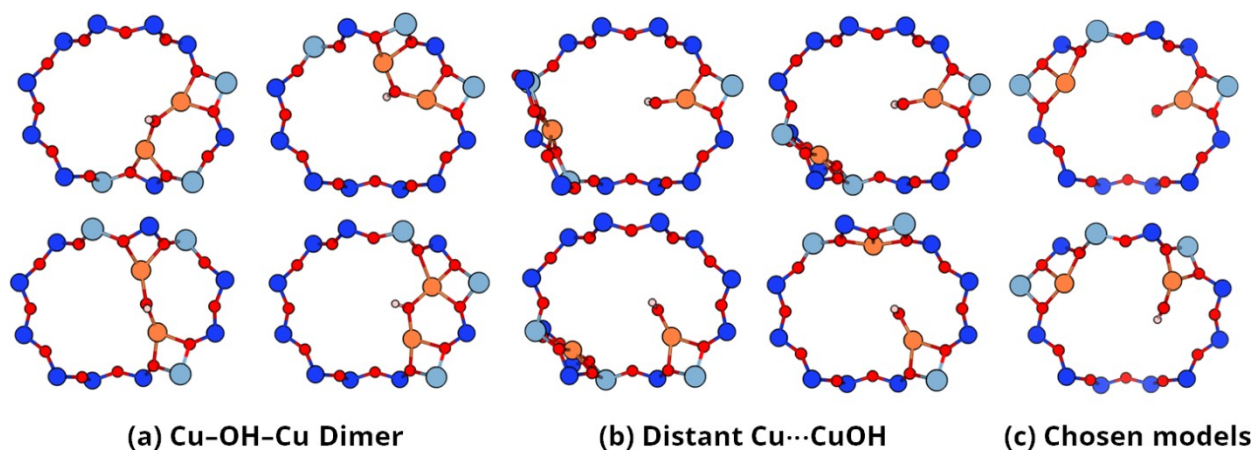

**Fig. S3** Considered CuOH-MOR models with the presence of a Cu<sup>2+</sup> spectator site.

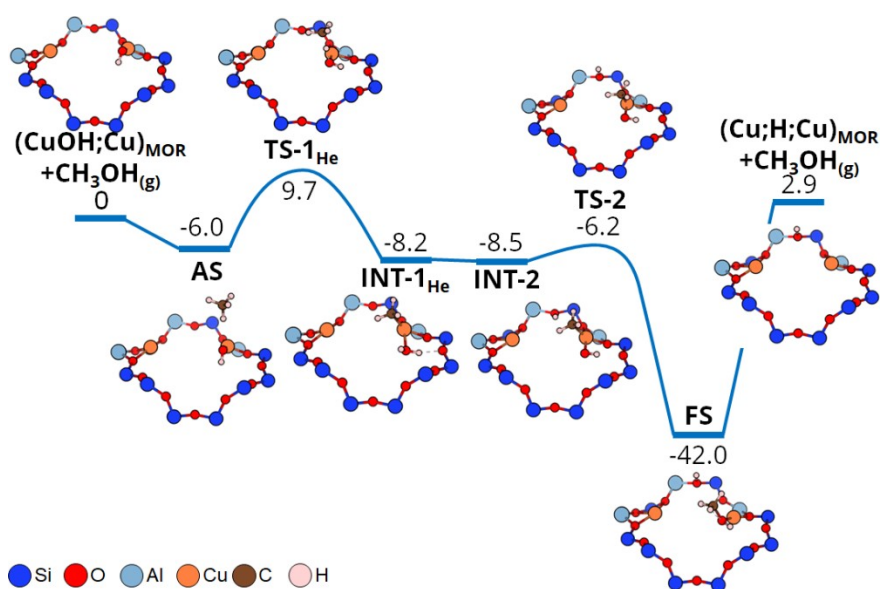

**Fig. S4** Energy diagram of the heterolytic C-H bond activation on CuOH@Al<sub>241</sub>.

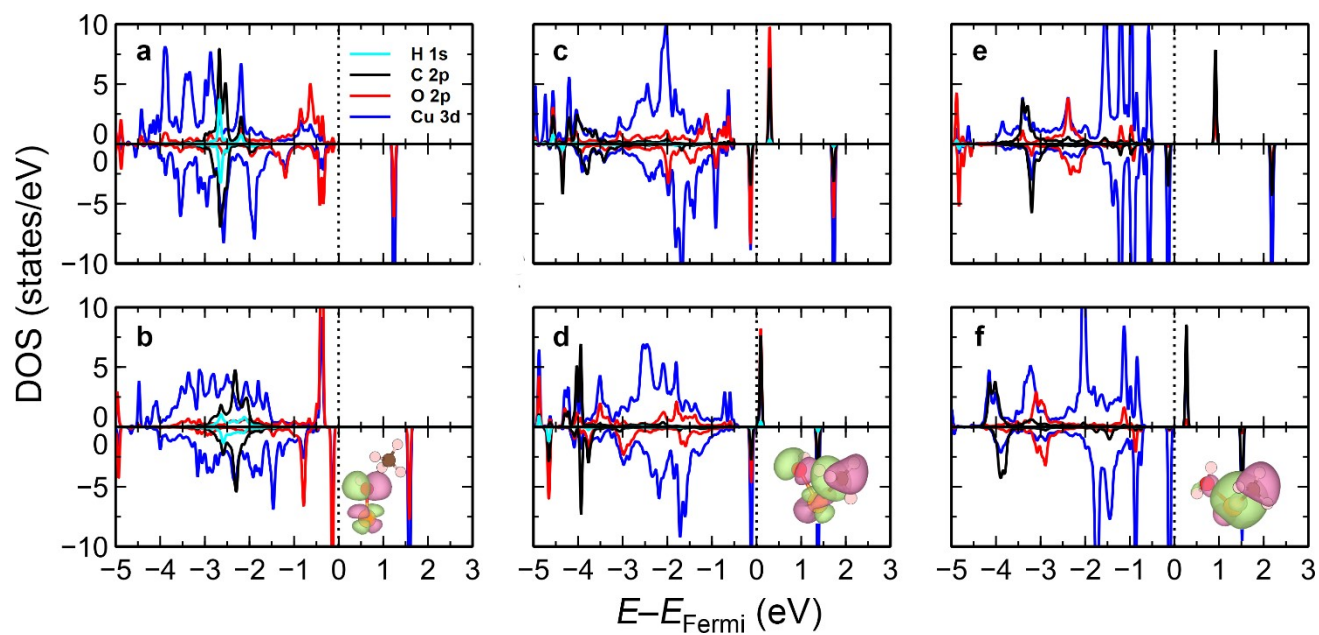

**Fig. S5** PDOS of (a,b) AS, (c,d) TS-1<sub>He</sub>, and (e,f) INT-1<sub>He</sub> in the respective ground state for the heterolytic CH<sub>4</sub> activation on the (top) CuOH@Al<sub>44</sub> and (below) CuOH@Al<sub>241</sub> sites.

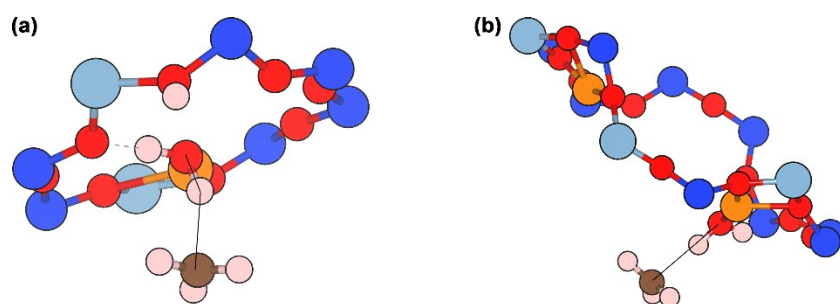

**Fig. S6** HOH...CH<sub>3</sub> interaction in INT-1<sub>H0</sub> for the (a) CuOH@Al<sub>44</sub> and (b) CuOH@Al<sub>241</sub> sites.
